# Supplementary material for: GSTM1, GSTT1, and GSTP1 Polymorphisms and Associations between Air Pollutants and Markers of Insulin Resistance in Elderly Koreans
Source: PubMed Central journal article supplement (PMC3491923; doi:10.1289/ehp.1104406), 2012-06-25
Supplement: ehp.1104406.s001.pdf [file ehp.1104406.s001.pdf]

## **Supplemental Material;**

### ***GSTM1, GSTT1, and GSTP1* Polymorphisms and Associations between Air**

### **Pollutants and Markers of Insulin Resistance in Elderly Koreans**

Jin Hee Kim<sup>1</sup> and Yun-Chul Hong<sup>1,2</sup>

<sup>1</sup>Institute of Environmental Medicine, Seoul National University Medical Research Center, Seoul, Republic of Korea; <sup>2</sup>Department of Preventive Medicine, Seoul National University College of Medicine, Seoul, Republic of Korea

#### **Table of Contents**

Supplemental Material, Table S1. P2

Supplemental Material, Table S2. P3

Supplemental Material, Table S3. P5

Supplemental Material, Figure S1. P6

Supplemental Material, Figure S2. P7

**Supplemental Material, T able S1.** Correlation among PM<sub>10</sub>, SO<sub>2</sub>, O<sub>3</sub>, and NO<sub>2</sub> exposure levels in the health examination day. Correlation coefficient and *p*-value were presented.

|                        | <b>PM<sub>10</sub></b> | <b>SO<sub>2</sub></b> | <b>O<sub>3</sub></b> | <b>NO<sub>2</sub></b> |
|------------------------|------------------------|-----------------------|----------------------|-----------------------|
| <b>PM<sub>10</sub></b> | 1                      | 0.61                  | -0.12                | 0.65                  |
|                        |                        | <.0001                | <.0001               | <.0001                |
| <b>SO<sub>2</sub></b>  |                        | 1                     | -0.30                | 0.56                  |
|                        |                        |                       | <.0001               | <.0001                |
| <b>O<sub>3</sub></b>   |                        |                       | 1                    | -0.35                 |
|                        |                        |                       |                      | <.0001                |
| <b>NO<sub>2</sub></b>  |                        |                       |                      | 1                     |

**Supplemental Material, Table S2.** Associations of PM<sub>10</sub>, SO<sub>2</sub>, O<sub>3</sub>, and NO<sub>2</sub> with glucose, insulin, and HOMA indices according to lag day.

|                  | Lag day | Glucose     |              |                 | Insulin     |             |                 | HOMA        |              |                 |
|------------------|---------|-------------|--------------|-----------------|-------------|-------------|-----------------|-------------|--------------|-----------------|
|                  |         | Estimate    | 95% CI       | <i>p</i> -Value | Estimate    | 95% CI      | <i>p</i> -Value | Estimate    | 95% CI       | <i>p</i> -Value |
| PM <sub>10</sub> | Lag 0   | 0.01        | -0.05, 0.08  | 0.6706          | -0.01       | -0.46, 0.44 | 0.9586          | -0.03       | -0.18, 0.13  | 0.7404          |
|                  | Lag 1   | 0.002       | -0.07, 0.07  | 0.9581          | 0.07        | -0.43, 0.57 | 0.7794          | 0.04        | -0.13, 0.21  | 0.6560          |
|                  | Lag 2   | 0.08        | 0.004, 0.15  | 0.0401          | 0.24        | -0.28, 0.77 | 0.3631          | 0.14        | -0.04, 0.32  | 0.1270          |
|                  | Lag 3   | 0.09        | 0.02, 0.15   | 0.0087          | 0.26        | -0.20, 0.73 | 0.2698          | 0.12        | -0.04, 0.28  | 0.1472          |
|                  | Lag 4   | 0.11        | 0.05, 0.17   | 0.0005          | 0.21        | -0.22, 0.64 | 0.3439          | 0.14        | -0.003, 0.29 | 0.0549          |
|                  | Lag 5   | 0.05        | -0.01, 0.10  | 0.1236          | 0.11        | -0.30, 0.52 | 0.6082          | 0.08        | -0.07, 0.22  | 0.2924          |
|                  | Lag 6   | 0.06        | 0.01, 0.11   | 0.0166          | 0.17        | -0.18, 0.52 | 0.3490          | 0.06        | -0.06, 0.19  | 0.2982          |
|                  | Lag 7   | 0.07        | 0.02, 0.12   | 0.0099          | 0.02        | -0.36, 0.40 | 0.9264          | 0.03        | -0.10, 0.16  | 0.6728          |
|                  | Lag 8   | 0.10        | 0.05, 0.16   | 0.0002          | 0.06        | -0.34, 0.46 | 0.7758          | 0.07        | -0.07, 0.20  | 0.3447          |
|                  | Lag 9   | 0.02        | -0.03, 0.07  | 0.4418          | -0.15       | -0.52, 0.22 | 0.4352          | -0.03       | -0.16, 0.10  | 0.6596          |
| Lag 10           | 0.05    | -0.01, 0.11 | 0.0866       | 0.22            | -0.20, 0.63 | 0.3057      | 0.08            | -0.06, 0.22 | 0.2594       |                 |
| SO <sub>2</sub>  | Lag 0   | -0.05       | -0.11, 0.01  | 0.1314          | 0.04        | -0.40, 0.47 | 0.8752          | -0.03       | -0.18, 0.12  | 0.6829          |
|                  | Lag 1   | -0.04       | -0.10, 0.02  | 0.1825          | 0.13        | -0.30, 0.56 | 0.5457          | 0.04        | -0.11, 0.18  | 0.6223          |
|                  | Lag 2   | 0.02        | -0.04, 0.08  | 0.5099          | 0.09        | -0.34, 0.53 | 0.6707          | 0.08        | -0.07, 0.23  | 0.2801          |
|                  | Lag 3   | 0.07        | 0.01, 0.13   | 0.0259          | 0.34        | -0.10, 0.78 | 0.1342          | 0.15        | -0.003, 0.30 | 0.0552          |
|                  | Lag 4   | 0.06        | -0.003, 0.12 | 0.0647          | 0.30        | -0.13, 0.73 | 0.1689          | 0.15        | 0.001, 0.29  | 0.0490          |
|                  | Lag 5   | -0.002      | -0.06, 0.06  | 0.9614          | 0.005       | -0.42, 0.43 | 0.9825          | 0.02        | -0.12, 0.17  | 0.7764          |
|                  | Lag 6   | 0.02        | -0.04, 0.08  | 0.4556          | 0.19        | -0.23, 0.60 | 0.3714          | 0.06        | -0.08, 0.20  | 0.4029          |
|                  | Lag 7   | 0.10        | 0.03, 0.16   | 0.0026          | 0.30        | -0.14, 0.74 | 0.1825          | 0.13        | -0.02, 0.28  | 0.0907          |
|                  | Lag 8   | 0.08        | 0.02, 0.15   | 0.0148          | 0.17        | -0.30, 0.64 | 0.4800          | 0.09        | -0.07, 0.25  | 0.2860          |
|                  | Lag 9   | 0.06        | -0.02, 0.13  | 0.1338          | 0.29        | -0.21, 0.79 | 0.2540          | 0.10        | -0.07, 0.27  | 0.2391          |
| Lag 10           | 0.04    | -0.04, 0.11 | 0.3469       | 0.38            | -0.14, 0.91 | 0.1505      | 0.11            | -0.07, 0.29 | 0.2364       |                 |
| O <sub>3</sub>   | Lag 0   | 0.11        | -0.01, 0.22  | 0.0756          | -0.05       | -0.87, 0.78 | 0.9138          | -0.01       | -0.30, 0.27  | 0.9235          |
|                  | Lag 1   | 0.19        | 0.09, 0.29   | 0.0002          | 0.42        | -0.31, 1.14 | 0.2592          | 0.22        | -0.03, 0.47  | 0.0858          |
|                  | Lag 2   | 0.08        | -0.02, 0.18  | 0.1009          | 0.42        | -0.27, 1.12 | 0.2297          | 0.17        | -0.07, 0.40  | 0.1677          |
|                  | Lag 3   | 0.09        | -0.004, 0.19 | 0.0607          | 0.36        | -0.35, 1.06 | 0.3196          | 0.12        | -0.12, 0.36  | 0.3367          |
|                  | Lag 4   | 0.11        | 0.02, 0.21   | 0.0211          | 0.78        | 0.10, 1.46  | 0.0252          | 0.25        | 0.02, 0.48   | 0.0375          |
|                  | Lag 5   | 0.19        | 0.09, 0.28   | 0.0001          | 0.70        | 0.02, 1.39  | 0.0439          | 0.30        | 0.06, 0.53   | 0.0139          |
|                  | Lag 6   | 0.10        | -0.002, 0.20 | 0.0549          | -0.02       | -0.76, 0.72 | 0.9612          | -0.02       | -0.27, 0.24  | 0.8948          |
|                  | Lag 7   | 0.01        | -0.10, 0.11  | 0.9026          | -0.57       | -1.31, 0.18 | 0.1353          | -0.22       | -0.47, 0.04  | 0.0966          |
|                  | Lag 8   | 0.09        | -0.01, 0.19  | 0.0838          | 0.30        | -0.41, 1.01 | 0.4102          | 0.09        | -0.15, 0.34  | 0.4500          |
|                  | Lag 9   | 0.07        | -0.02, 0.16  | 0.1480          | 0.35        | -0.31, 1.02 | 0.2994          | 0.16        | -0.07, 0.39  | 0.1699          |
| Lag 10           | 0.03    | -0.06, 0.13 | 0.5055       | 0.51            | -0.20, 1.22 | 0.1583      | 0.15            | -0.09, 0.39 | 0.2224       |                 |
| NO <sub>2</sub>  | Lag 0   | 0.03        | -0.03, 0.09  | 0.3734          | 0.49        | 0.04, 0.94  | 0.0342          | 0.15        | 0.0002, 0.31 | 0.0503          |

|        |       |             |        |       |             |        |      |             |        |
|--------|-------|-------------|--------|-------|-------------|--------|------|-------------|--------|
| Lag 1  | 0.01  | -0.05, 0.08 | 0.7364 | 0.33  | -0.14, 0.79 | 0.1675 | 0.13 | -0.03, 0.29 | 0.1005 |
| Lag 2  | 0.05  | -0.02, 0.12 | 0.1329 | 0.47  | 0.005, 0.94 | 0.0483 | 0.20 | 0.04, 0.36  | 0.0126 |
| Lag 3  | 0.07  | 0.01, 0.13  | 0.0310 | 0.23  | -0.21, 0.66 | 0.3090 | 0.13 | -0.02, 0.28 | 0.0937 |
| Lag 4  | 0.08  | 0.02, 0.14  | 0.0078 | 0.07  | -0.34, 0.47 | 0.7554 | 0.09 | -0.05, 0.23 | 0.2154 |
| Lag 5  | 0.04  | -0.02, 0.10 | 0.1765 | 0.001 | -0.41, 0.41 | 0.9977 | 0.03 | -0.11, 0.17 | 0.6619 |
| Lag 6  | 0.05  | -0.01, 0.11 | 0.1121 | 0.41  | -0.02, 0.84 | 0.0628 | 0.15 | 0.004, 0.30 | 0.0452 |
| Lag 7  | 0.11  | 0.05, 0.17  | 0.0004 | 0.71  | 0.29, 1.14  | 0.0010 | 0.28 | 0.13, 0.42  | 0.0002 |
| Lag 8  | 0.08  | 0.02, 0.14  | 0.0124 | 0.35  | -0.10, 0.79 | 0.1307 | 0.16 | 0.01, 0.32  | 0.0354 |
| Lag 9  | 0.03  | -0.03, 0.10 | 0.3184 | 0.34  | -0.13, 0.81 | 0.1543 | 0.08 | -0.08, 0.25 | 0.3039 |
| Lag 10 | -0.02 | -0.08, 0.04 | 0.5795 | 0.26  | -0.18, 0.70 | 0.2508 | 0.03 | -0.12, 0.18 | 0.6573 |

Changes in glucose, insulin, and HOMA indices by an IQR-change of PM<sub>10</sub> (20.8 µg/m<sup>3</sup>), SO<sub>2</sub> (1.6 ppb), O<sub>3</sub> (15.1 ppb), and NO<sub>2</sub> (10.8 ppb) were estimated in linear mixed-effect models after weighting follow-up observations and adjusting for age, sex, BMI, cotinine level, and outdoor temperature and dew point in the day. CI, Confidence Interval.

**Supplemental Material, Table S3.** Associations of PM<sub>10</sub>, O<sub>3</sub>, and NO<sub>2</sub> with glucose, insulin, and HOMA indices in multiple pollutant models.

|                              | Glucose  |              |                 | Insulin  |             |                 | HOMA     |              |                 |
|------------------------------|----------|--------------|-----------------|----------|-------------|-----------------|----------|--------------|-----------------|
|                              | Estimate | 95% CI       | <i>p</i> -Value | Estimate | 95% CI      | <i>p</i> -Value | Estimate | 95% CI       | <i>p</i> -Value |
| <b>Two pollutant model</b>   |          |              |                 |          |             |                 |          |              |                 |
| PM <sub>10</sub>             | 0.08     | 0.01, 0.14   | 0.0178          | 0.07     | -0.38, 0.52 | 0.7579          | 0.09     | -0.06, 0.25  | 0.2345          |
| O <sub>3</sub>               | 0.15     | 0.05, 0.25   | 0.0036          | 0.67     | -0.06, 1.39 | 0.0711          | 0.25     | -0.001, 0.49 | 0.0518          |
| PM <sub>10</sub>             | 0.08     | 0.02, 0.15   | 0.0074          | 0.03     | -0.41, 0.47 | 0.8955          | 0.08     | -0.07, 0.23  | 0.2989          |
| NO <sub>2</sub>              | 0.08     | 0.02, 0.15   | 0.0068          | 0.71     | 0.27, 1.14  | 0.0016          | 0.26     | 0.11, 0.41   | 0.0007          |
| O <sub>3</sub>               | 0.16     | 0.06, 0.25   | 0.0011          | 0.49     | -0.20, 1.19 | 0.1649          | 0.21     | -0.02, 0.45  | 0.0787          |
| NO <sub>2</sub>              | 0.09     | 0.03, 0.15   | 0.0049          | 0.65     | 0.22, 1.08  | 0.0031          | 0.25     | 0.10, 0.40   | 0.0009          |
| <b>Three pollutant model</b> |          |              |                 |          |             |                 |          |              |                 |
| PM <sub>10</sub>             | 0.06     | -0.005, 0.12 | 0.0695          | -0.07    | -0.53, 0.39 | 0.7758          | 0.04     | -0.11, 0.20  | 0.5799          |
| O <sub>3</sub>               | 0.13     | 0.03, 0.23   | 0.0094          | 0.52     | -0.20, 1.25 | 0.1582          | 0.19     | -0.06, 0.44  | 0.1280          |
| NO <sub>2</sub>              | 0.07     | 0.01, 0.14   | 0.0179          | 0.67     | 0.23, 1.11  | 0.0032          | 0.24     | 0.09, 0.39   | 0.0016          |

*p*-Values obtained after weighting follow-up observations of PM<sub>10</sub>, O<sub>3</sub>, and NO<sub>2</sub> on lag day 4, lag day 5, and lag day 7, respectively. Changes in glucose, insulin, and HOMA indices by an IQR-change of PM<sub>10</sub> (20.8 μg/m<sup>3</sup>), O<sub>3</sub> (15.1 ppb), and NO<sub>2</sub> (10.8 ppb) were estimated after adjustment for age, sex, BMI, cotinine level, and outdoor temperature and dew point in the day. CI, Confidence Interval.

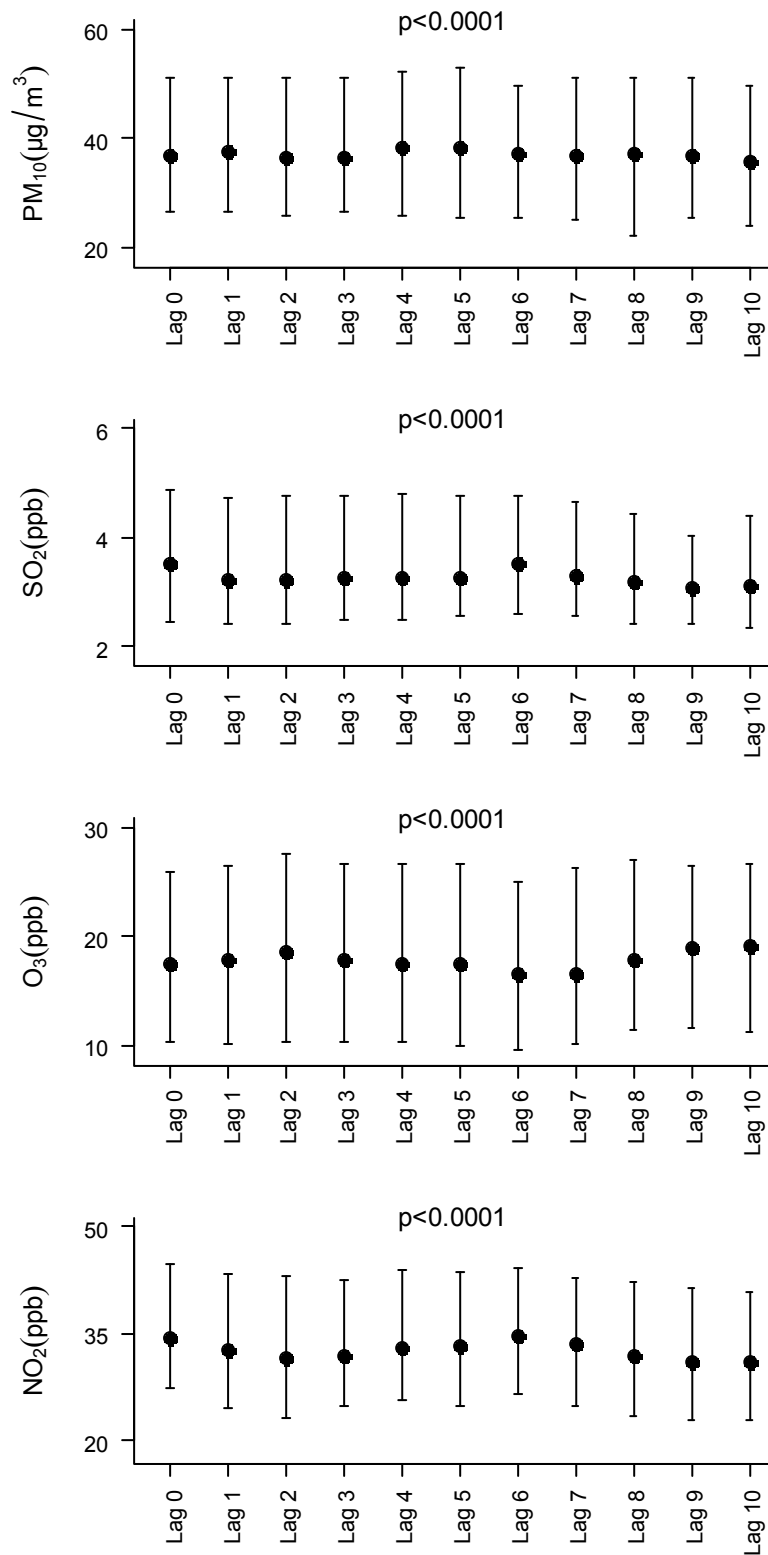

**Supplemental Material, Figure e S1.** Variation of air pollutant levels over 11 days including the health examination day. Median values of each pollutants and ranges between 25<sup>th</sup> and 75<sup>th</sup> percentiles were presented.

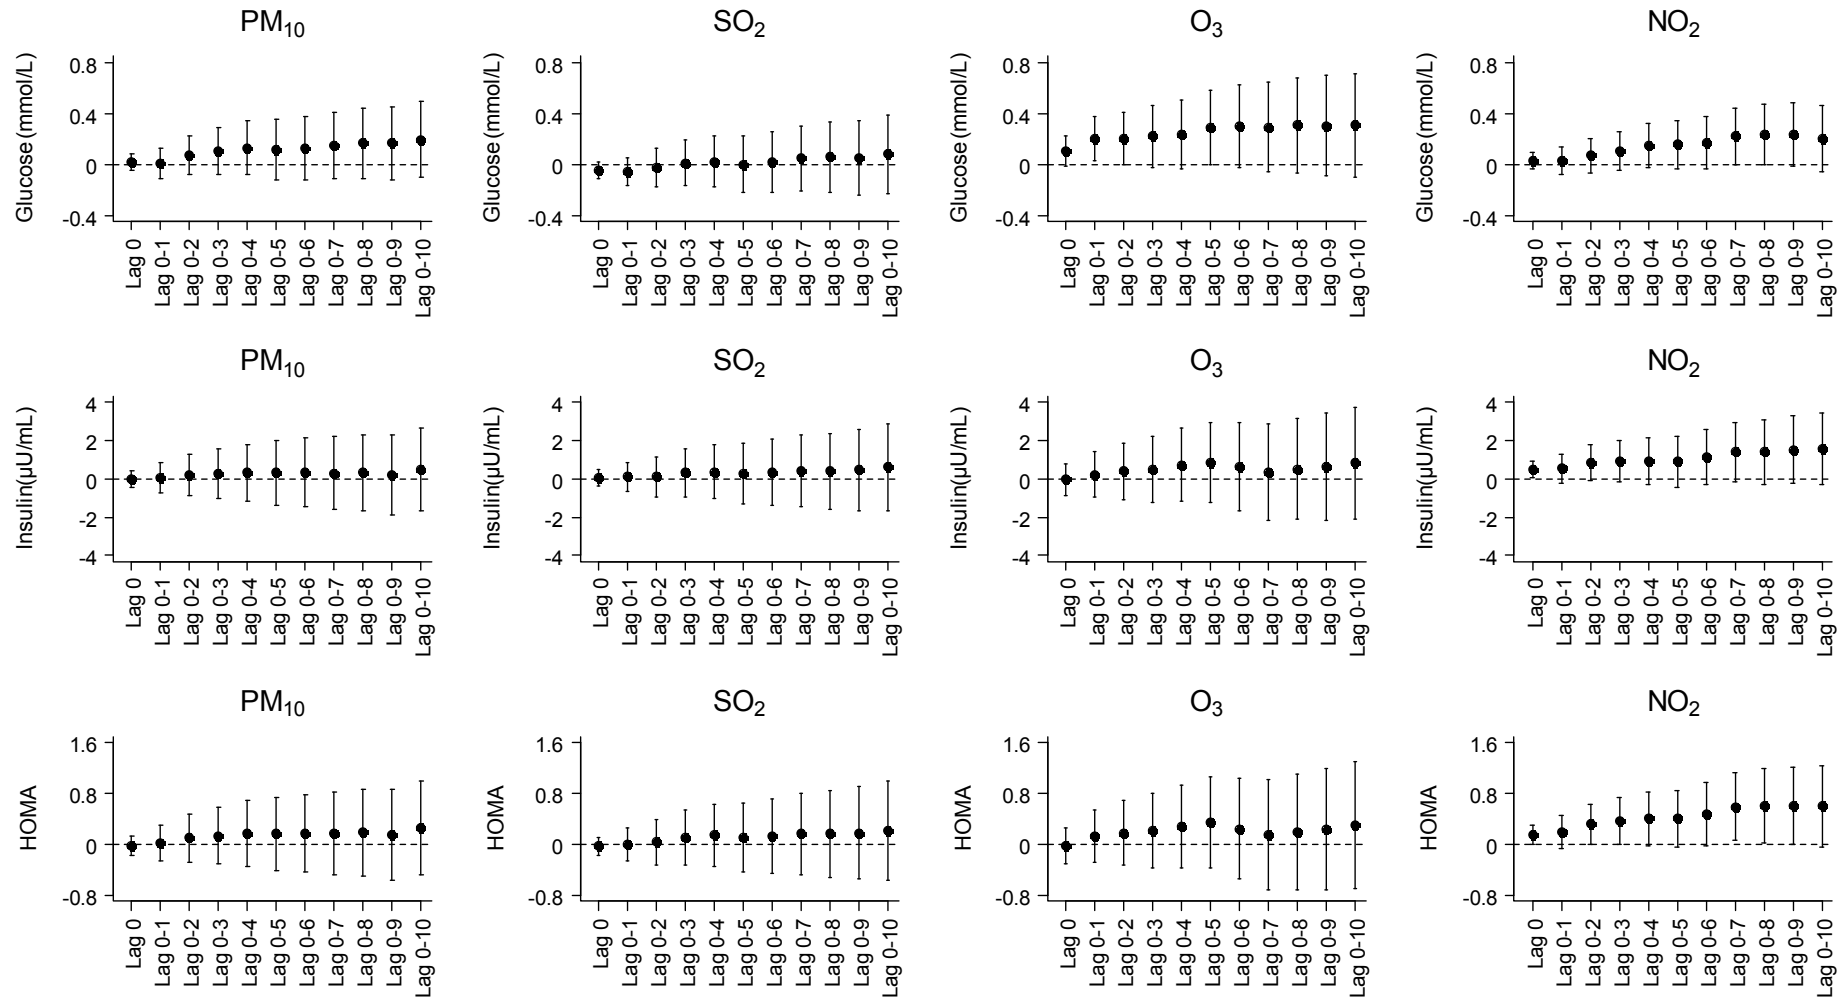

**Supplemental Material, Figure S2.** Associations of PM<sub>10</sub>, SO<sub>2</sub>, O<sub>3</sub>, and NO<sub>2</sub> with glucose, insulin, and HOMA indices by distributed lag days in total subjects. Changes in glucose, insulin, and HOMA indices by an IQR-change of PM<sub>10</sub> (20.8 μg/m<sup>3</sup>), SO<sub>2</sub> (1.6 ppb), O<sub>3</sub> (15.1 ppb), and NO<sub>2</sub> (10.8 ppb) were estimated after adjustment for age, sex, BMI, cotinine level, and outdoor temperature and dew point in the day.
